# Supplementary material
Source: Springer Nature journal article supplement (https://www.springermedizin.de/resource/supplementary/12879_2007_655_MOESM1_ESM.pdf/9449436)

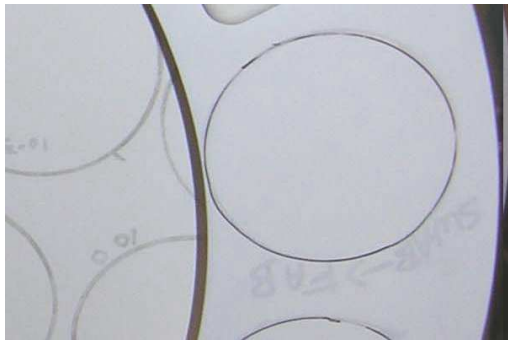

A

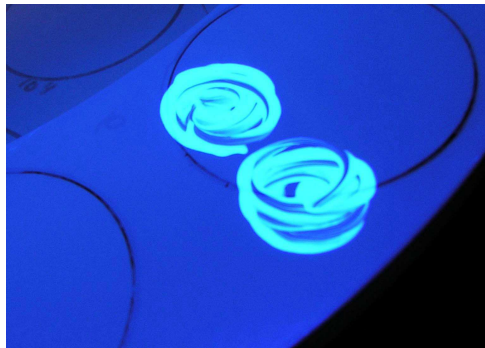

B

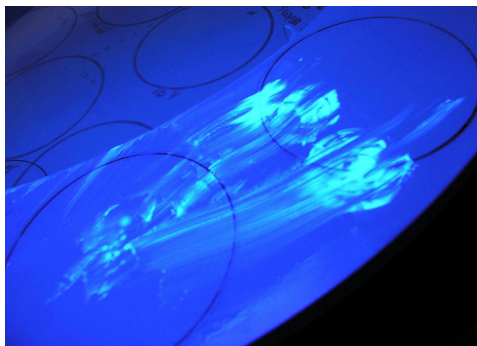

C

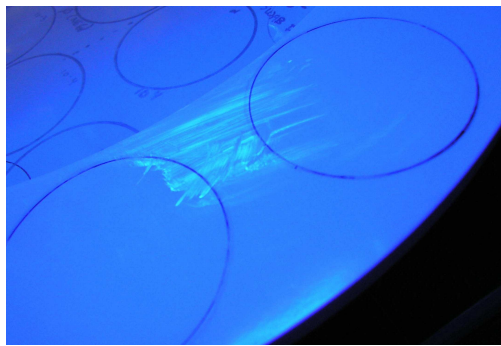

D

Supplement: MOESM1 [file 9449436]
